# Supplementary material for: Genetic origin and composition of a natural hybrid poplar Populus × jrtyschensis from two distantly related species
Source: PubMed Central journal article supplement (PMC4836070; doi:10.1186/s12870-016-0776-6), 2016-04-18

Additional file 15 The geographical distribution of populations.

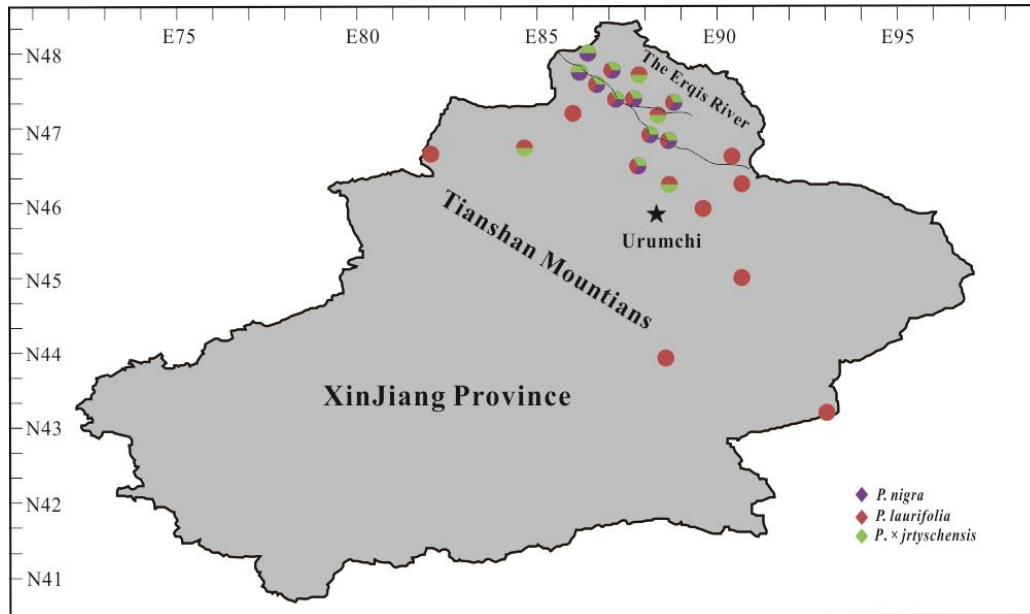

Supplement: 12870_2016_776_MOESM1_ESM.pdf [file 12870_2016_776_MOESM1_ESM.pdf]
