# Supplementary material for: Genetic origin and composition of a natural hybrid poplar Populus × jrtyschensis from two distantly related species
Source: PubMed Central journal article supplement (PMC4836070; doi:10.1186/s12870-016-0776-6), 2016-04-18
Supplement: 12870_2016_776_MOESM2_ESM.pdf [file 12870_2016_776_MOESM2_ESM.pdf]

Additional file 1 Variable sites of the aligned sequences of chloroplast DNA fragment in eight haplotypes of *P. nigra*, *P. laurifolia* and *P. × jrtyschensis*.

| Chlorotype | <i>rbcL</i> |   |    |    |    |     |     |     |     |     |     |     |     |
|------------|-------------|---|----|----|----|-----|-----|-----|-----|-----|-----|-----|-----|
|            | 1           | 7 | 39 | 50 | 66 | 213 | 243 | 272 | 415 | 670 | 735 | 745 | 781 |
| H1         | A           | G | T  | C  | C  | T   | C   | T   | T   | G   | C   | G   | C   |
| H2         | A           | A | G  | A  | A  | T   | C   | T   | A   | A   | G   | A   | C   |
| H3         | A           | G | T  | C  | C  | G   | C   | T   | T   | G   | C   | G   | C   |
| H4         | A           | A | T  | C  | A  | T   | C   | A   | A   | A   | G   | A   | C   |
| H5         | A           | G | T  | C  | C  | T   | T   | T   | T   | G   | C   | G   | C   |
| H6         | A           | G | T  | C  | C  | T   | C   | T   | T   | G   | A   | G   | C   |
| H7         | G           | G | T  | C  | C  | T   | C   | T   | T   | G   | C   | G   | C   |
| H8         | G           | G | T  | C  | C  | T   | C   | T   | T   | G   | C   | G   | T   |
