# Supplementary material for: Genetic origin and composition of a natural hybrid poplar Populus × jrtyschensis from two distantly related species
Source: PubMed Central journal article supplement (PMC4836070; doi:10.1186/s12870-016-0776-6), 2016-04-18
Supplement: 12870_2016_776_MOESM4_ESM.pdf [file 12870_2016_776_MOESM4_ESM.pdf]

Table S14  $\Phi_{st}$  values for each taxa pair at 8 nuclear loci and for SSR data set.

| $\Phi_{st}$   | <i>P. nigra</i> vs. <i>P. × jrtyschensis</i> | <i>P. × jrtyschensis</i> vs <i>P. laurifolia</i> | <i>P. nigra</i> vs. <i>P. laurifolia</i> |
|---------------|----------------------------------------------|--------------------------------------------------|------------------------------------------|
| Dehy          | 0.2694***                                    | 0.29086***                                       | 0.68641***                               |
| Phyto A       | 0.29852***                                   | 0.26236***                                       | 0.75115***                               |
| Phyto B       | 0.35796***                                   | 0.42896***                                       | 0.86193***                               |
| PAL           | 0.1707***                                    | 0.3244***                                        | 0.38799***                               |
| AREB1         | 0.11899**                                    | 0.10382***                                       | 0.36672***                               |
| ERD7          | 0.32606***                                   | 0.35706***                                       | 0.84995***                               |
| EIN3          | 0.04084***                                   | 0.04452***                                       | 0.13621***                               |
| LTCOR11       | 0.34529***                                   | 0.34446***                                       | 0.88673***                               |
| PeuSSR_37942  | 0.19252***                                   | 0.1734***                                        | 0.42833***                               |
| PeuSSR_69373  | 0.18542***                                   | 0.15125***                                       | 0.48010***                               |
| PeuSSR_82554  | 0.04582***                                   | 0.00177                                          | 0.05562***                               |
| PeuSSR_98348  | 0.25472***                                   | 0.16250***                                       | 0.55249***                               |
| PeuSSR_135688 | 0.20215***                                   | 0.14159***                                       | 0.48900***                               |
| PeuSSR_135862 | 0.27646***                                   | 0.37595***                                       | 0.81113***                               |
| PeuSSR_149476 | 0.26314***                                   | 0.22424***                                       | 0.67514***                               |
| PeuSSR_185039 | 0.26030***                                   | 0.00112                                          | 0.23852***                               |
| PeuSSR_1063   | 0.21198***                                   | 0.12400***                                       | 0.48802***                               |
| PeuSSR_1065   | 0.33253***                                   | 0.30634***                                       | 0.76772***                               |
| PeuSSR_114    | 0.09591***                                   | 0.28614***                                       | 0.57969***                               |
| PeuSSR_1158   | 0.17326***                                   | 0.16689***                                       | 0.52311***                               |
| PeuSSR_124    | 0.38168***                                   | 0.38093***                                       | 0.86655***                               |
| PeuSSR_1255   | 0.15322***                                   | 0.21829***                                       | 0.46648***                               |
| PeuSSR_1260   | 0.08675***                                   | 0.03101*                                         | 0.10927***                               |
| PeuSSR_11     | 0.04400***                                   | 0.00607*                                         | 0.04742***                               |
| PeuSSR_186    | 0.40873***                                   | 0.00227                                          | 0.34875***                               |
| PeuSSR_190    | 0.28671***                                   | 0.31691***                                       | 0.78605***                               |
| PeuSSR_264    | 0.10999***                                   | 0.02404**                                        | 0.18596***                               |
| PeuSSR_279    | 0.04342**                                    | 0.07173***                                       | 0.15041***                               |

Significance at \*  $P < 0.05$ , \*\*  $P < 0.01$  and \*\*\*  $P < 0.001$ .
