# Supplementary material for: Genetic origin and composition of a natural hybrid poplar Populus × jrtyschensis from two distantly related species
Source: PubMed Central journal article supplement (PMC4836070; doi:10.1186/s12870-016-0776-6), 2016-04-18
Supplement: 12870_2016_776_MOESM6_ESM.pdf [file 12870_2016_776_MOESM6_ESM.pdf]

Additional file 3 Characteristics of 20 microsatellite loci scored in 566 individuals

| Locus Name    | Number of alleles | Allelic richness |
|---------------|-------------------|------------------|
| PeuSSR_37942  | 11                | 2.907            |
| PeuSSR_69373  | 18                | 2.959            |
| PeuSSR_82554  | 43                | 3.667            |
| PeuSSR_98348  | 20                | 2.742            |
| PeuSSR_135688 | 29                | 2.904            |
| PeuSSR_135862 | 7                 | 2.09             |
| PeuSSR_149476 | 13                | 2.386            |
| PeuSSR_185039 | 34                | 2.767            |
| PeuSSR_1063   | 17                | 2.937            |
| PeuSSR_1065   | 5                 | 2.008            |
| PeuSSR_114    | 5                 | 1.712            |
| PeuSSR_1158   | 11                | 2.588            |
| PeuSSR_124    | 5                 | 2.016            |
| PeuSSR_1255   | 14                | 2.633            |
| PeuSSR_1260   | 10                | 2.696            |
| PeuSSR_11     | 24                | 1.57             |
| PeuSSR_186    | 25                | 2.165            |
| PeuSSR_190    | 18                | 2.43             |
| PeuSSR_264    | 24                | 1.368            |
| PeuSSR_279    | 40                | 3.49             |
