# Supplementary material for: Genetic origin and composition of a natural hybrid poplar Populus × jrtyschensis from two distantly related species
Source: PubMed Central journal article supplement (PMC4836070; doi:10.1186/s12870-016-0776-6), 2016-04-18
Supplement: 12870_2016_776_MOESM7_ESM.pdf [file 12870_2016_776_MOESM7_ESM.pdf]

Table S13 Description of all scenarios used in the Approximate Bayesian Computation analysis in DIYABC v2.0.4 to test the hybrid origin.

|                  | Scenario | Posterior probability | Credibility interval |
|------------------|----------|-----------------------|----------------------|
|                  | 1        | 0.978                 | (0.9594, 0.9966)     |
| SSR              | 2        | 0.004                 | (0.0000, 0.0010)     |
|                  | 3        | 0.0216                | (0.0030, 0.0420)     |
| Nuclear<br>genes | 1        | 0.382                 | (0.0000, 0.8079)     |
|                  | 2        | 0.28                  | (0.0000, 0.6736)     |
|                  | 3        | 0.338                 | (0.0000, 0.7526)     |
