# Supplementary material for: Genetic origin and composition of a natural hybrid poplar Populus × jrtyschensis from two distantly related species
Source: PubMed Central journal article supplement (PMC4836070; doi:10.1186/s12870-016-0776-6), 2016-04-18
Supplement: 12870_2016_776_MOESM12_ESM.pdf [file 12870_2016_776_MOESM12_ESM.pdf]

Additional file 8 The genes and primers used in this study

| Gene    | Forward Primer         | Reverse Primer        | Length (bp) |
|---------|------------------------|-----------------------|-------------|
| Dehy    | TACTGCCATGAGCGAAGATG   | GGTGTGTACCTCAGCGGTCT  | 874         |
| Phyto A | CCACCCAGGTCTGACAAAGT   | GAGGGATATCAGTGGCTGGA  | 600         |
| Phyto B | ATATGGCGAATATGGGGTCA   | GGCATCCATTTCTGCATTCT  | 842         |
| PAL     | TGGATTGCCATCAAATCTCA   | CTCTTGCGCTCTCAACCTCT  | 781         |
| AREB1   | GAGCTTCACAAATGACCCGTC  | ACTCCCATCCCTCCACCCT   | 480         |
| ERD7    | ACCTCCTCCTCTCCATCCTCA  | CCGCAGCAATCAACTTACCAG | 872         |
| EIN3    | GGATTACAGCGATGAAGAGAT  | ACTCTCCTTGGCAGTCATCTT | 583         |
| LTCOR11 | GCCAAGGTTTAAGGTTTCAATT | ACAGCAAGTCCCACATGCTCT | 816         |
