# Supplementary material for: Genetic origin and composition of a natural hybrid poplar Populus × jrtyschensis from two distantly related species
Source: PubMed Central journal article supplement (PMC4836070; doi:10.1186/s12870-016-0776-6), 2016-04-18
Supplement: 12870_2016_776_MOESM13_ESM.pdf [file 12870_2016_776_MOESM13_ESM.pdf]

Additional file 10 SSR Primers used in this study

| Primer name   | Forward Primer             | Reverse Primer          | Length | Repeats |
|---------------|----------------------------|-------------------------|--------|---------|
| PeuSSR_37942  | TGTTGCTTTTGAATGAGAACAGC    | CCTGCAATGTGCAAACAG      | 315    | T       |
| PeuSSR_69373  | AAATCATGGAGAATAATGGCAGTC   | TTCAATGCAAAAGCAGACCAC   | 340    | A       |
| PeuSSR_82554  | CTCCTTAGTTAGGTCCCACAAA     | CCATTAACGGCTTCAAGG      | 193    | AT      |
| PeuSSR_98348  | CCTCTTCTTCACAGAATCAGAC     | GGGATGAGTGAATGGGGTTTC   | 256    | GA      |
| PeuSSR_135688 | GAGATCATGCTGTGGAAGGTAAC    | ATATATTCACGGGTGGTGAT    | 204    | CA      |
| PeuSSR_135862 | TGTCTTGGCTTAAACCTCC        | CCACTCCATTTCCCTATCCTCTA | 272    | AGA     |
| PeuSSR_149476 | CTGTTACCTGGCATTCTGTATCA    | TACTGTTGGGAGCATTAGGCAG  | 313    | TC      |
| PeuSSR_185039 | CCACGGCAGAATCTTCCTA        | GGGTACTGTTTGTATTATTTTGG | 205    | TA      |
| PeuSSR_1063   | AGTTAATTGCGCATGTTCTT       | AAACAAACTCCAGCAAACAT    | 165    | CA      |
| PeuSSR_1065   | TGCAATCATATATTCCTCCC       | ATAAAATTAAGTGCCTGCCAT   | 156    | AC      |
| PeuSSR_114    | TTAGCCATTGGATTTCAATT       | CATTGCACTCTCACACATTC    | 112    | TTC     |
| PeuSSR_1158   | ATGCACTTCCTTCCAAATTA       | ATCAGTTCCTTCCAGCTTCAA   | 225    | CTG     |
| PeuSSR_124    | TTTGAGCACTTCAACTACCA       | TGTCTTCCCTTAGTCACCAC    | 198    | CAC     |
| PeuSSR_1255   | GAACCTTAAAACCAGAACCC       | GAGCCACAGAAATACTGCTC    | 207    | AG      |
| PeuSSR_1260   | CACAGGAACCTGGTTATCAT       | CTGGCATTCCCTTCTAAGCTA   | 134    | TG      |
| PeuSSR_11     | CGATTAATCTCTTCTACTAGGCCATT | GCTGCTGCTAATGGATGTGA    | 185    | AT      |
| PeuSSR_186    | GGCTAGGAATACCCTGGAGAA      | AAGCCATCTCGACTATACACCA  | 234    | TTTA    |
| PeuSSR_190    | CCCTGGTTTTCTCTTCTTGG       | CCAGATTGGACTTGGGATTC    | 209    | TG      |
| PeuSSR_264    | AAACCATAGGCATCAAAGCA       | TTCATGCAAGGCATCAATTC    | 197    | GT      |
| PeuSSR_279    | TCAAATCAAACCACAAAACACA     | TGAGACGAACATATCCTTCACC  | 197    | AT      |
