# Supplementary material for: Genetic origin and composition of a natural hybrid poplar Populus × jrtyschensis from two distantly related species
Source: PubMed Central journal article supplement (PMC4836070; doi:10.1186/s12870-016-0776-6), 2016-04-18
Supplement: 12870_2016_776_MOESM14_ESM.pdf [file 12870_2016_776_MOESM14_ESM.pdf]

Additional file 11 Three different sites for each taxon used in soil nitrogen analysis.

| Taxon                                           | popID | Latitude (°N) | Longitude (°W) | Altitude (M) |
|-------------------------------------------------|-------|---------------|----------------|--------------|
| <i>Populus nigra</i> L.                         | Pn29  | 47.36342      | 87.82258       | 562          |
|                                                 | Pn31  | 46.70075      | 87.71975       | 562          |
|                                                 | Pn70  | 47.99892      | 85.69708       | 424          |
| <i>Populus</i> × <i>jrtyshensis</i> Ch. Y. Yang | Pj36  | 47.26303      | 88.29742       | 578          |
|                                                 | Pj52  | 47.72192      | 86.82469       | 471          |
|                                                 | Pj60  | 48.14525      | 86.39414       | 565          |
| <i>Populus laurifolia</i> Ledeb.                | Pl12  | 46.85089      | 90.29322       | 1386         |
|                                                 | Pl20  | 47.2465       | 89.9395        | 1274         |
|                                                 | Pl41  | 47.54531      | 87.896         | 527          |
