# Supplementary material for: Genetic origin and composition of a natural hybrid poplar Populus × jrtyschensis from two distantly related species
Source: PubMed Central journal article supplement (PMC4836070; doi:10.1186/s12870-016-0776-6), 2016-04-18
Supplement: 12870_2016_776_MOESM15_ESM.pdf [file 12870_2016_776_MOESM15_ESM.pdf]

Additional file 9 GenBank Accession numbers of all newly obtained sequences for the three taxa included in this study.

| Species                          | <i>rbcL</i> sequence and Nuclear genes    | Genebank Accession numbers |                     |
|----------------------------------|-------------------------------------------|----------------------------|---------------------|
| <i>Populus nigra</i> L.          | <i>rbcL</i>                               | KT626975 - KT627120        |                     |
|                                  | Dehy                                      | KT628410 - KT628497        |                     |
|                                  | Phyto A                                   | KT629436 - KT629521        |                     |
|                                  | Phyto B                                   | KT629522 - KT629603        |                     |
|                                  | PAL                                       | KT629364 - KT629435        |                     |
|                                  | AREB1                                     | KT628322 - KT628409        |                     |
|                                  | ERD7                                      | KT628566 - KT628659        |                     |
|                                  | EIN3                                      | KT628498 - KT628565        |                     |
|                                  | LTCOR11                                   | KT628660 - KT628729        |                     |
|                                  | <i>Populus × jrtyschensis</i> Ch. Y. Yang | <i>rbcL</i>                | KT628107 - KT628321 |
|                                  |                                           | Dehy                       | KT627237 - KT627354 |
| Phyto A                          |                                           | KT627849 - KT627978        |                     |
| Phyto B                          |                                           | KT627979 - KT628106        |                     |
| PAL                              |                                           | KT627723 - KT627848        |                     |
| AREB1                            |                                           | KT627121 - KT627236        |                     |
| ERD7                             |                                           | KT627465 - KT627594        |                     |
| EIN3                             |                                           | KT627355 - KT627464        |                     |
| LTCOR11                          |                                           | KT627595 - KT627722        |                     |
| <i>Populus laurifolia</i> Ledeb. |                                           | <i>rbcL</i>                | KT629604 - KT629820 |
|                                  |                                           | Dehy                       | KT628810 - KT628883 |
|                                  | Phyto A                                   | KT629212 - KT629285        |                     |
|                                  | Phyto B                                   | KT629286 - KT629363        |                     |
|                                  | PAL                                       | KT629132 - KT629211        |                     |
|                                  | AREB1                                     | KT628730 - KT628809        |                     |
|                                  | ERD7                                      | KT628968 - KT629049        |                     |
|                                  | EIN3                                      | KT628884 - KT628967        |                     |
|                                  | LTCOR11                                   | KT629050 - KT629131        |                     |
