# Supplementary material for: Genetic origin and composition of a natural hybrid poplar Populus × jrtyschensis from two distantly related species
Source: BMC Plant Biol. 2016 Apr 18;16:89. doi: 10.1186/s12870-016-0776-6 (PMC4836070; doi:10.1186/s12870-016-0776-6)
Supplement: Additional file 8: — Summary results of one-way ANOVAs to determine the significant differences in soil nitrogen concentration at a depth of 0–20 cm for three taxa. (PDF 99 kb) [file 12870_2016_776_MOESM8_ESM.pdf]

Additional file 4 Summary results of one-way ANOVAs to determine the significant differences on soil nitrogen concentration in 0-20 cm for three taxa. (superscript a,  $P<0.05$ ; b,  $P<0.01$ ; c,  $P<0.001$ ; PN, *P. nigra*; PJ, *P. ×jrtyschensis*; PL, *P. laurifolia*)

[illegible]
